# Supplementary material for: The homing and inhibiting effects of hNSCs-BMP4 on human glioma stem cells
Source: PubMed Central journal article supplement (PMC4951260; doi:10.18632/oncotarget.7472), 2016-02-18
Supplement: oncotarget-07-17920-s001.pdf [file oncotarget-07-17920-s001.pdf]

SUPPLEMENTARY FIGURES

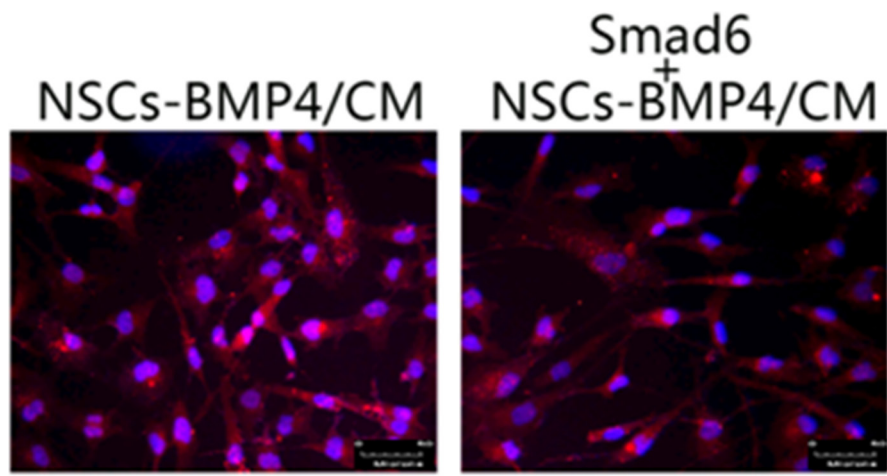

**Supplementary Figure S1: Immunofluorescence staining of phosphorylation of Smad1.** After transfection of Smad6 for 48hours, significant expression and nuclear translocation of phospho-Smad1 was still observed in hGSCs.

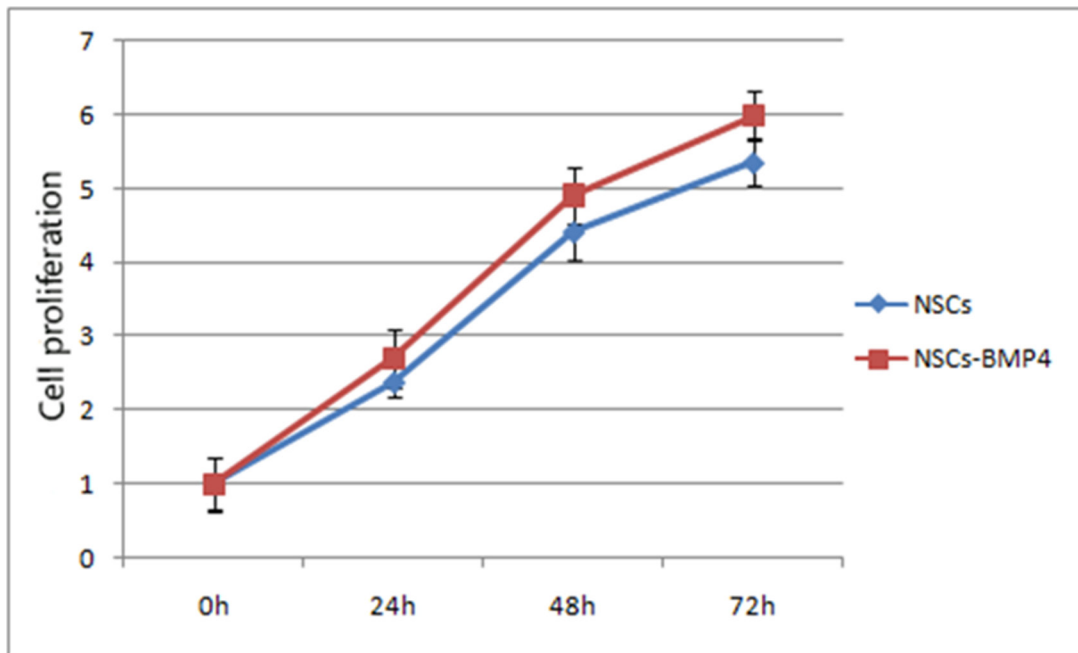

**Supplementary Figure S2: The effect of BMP4 over-expression on hNSCs proliferation.** The proliferate ability of hNSCs and hNSCs-BMP4 were detected by CCK-8 assay. All experiments were performed in triplicate in three independent sets. The values are shown as means  $\pm$  SD.

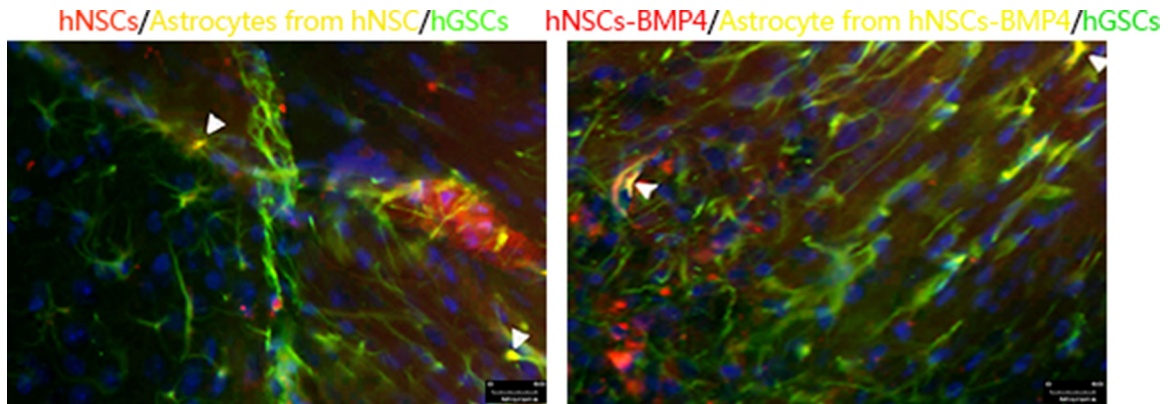

**Supplementary Figure S3: hNSCs-RFP and hNSCs-BMP4-RFP were able to migrate into hGSCs-GFP xenograft and differentiate into astrocyte.** GFAP immunofluorescence staining was undertaken to detect the astrocytes differentiation of hNSCs and hNSCs-BMP4 in the frozen section of xenografts. Using confocal fluorescent microscopy, we observed hGSCs with green color, hNSCs or hNSC-BMP4 with red color and astrocytes that were differentiated from hNSCs and hNSCs-BMP4 with yellow color.

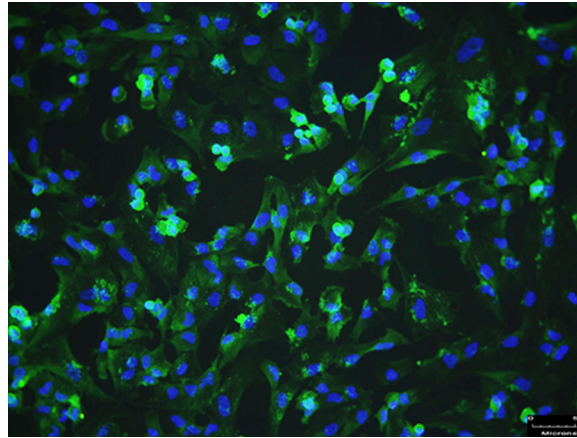

**Supplementary Figure S4: The transfection efficiency of pCS2-Smad6.** After 48 hours of pCS2-Smad6-EGFP transfection, hGSCs were stained by DAPI and then observed under confocal fluorescent microscopy.
